# Supplementary material for: Whole-Genome and Chromosome Evolution Associated with Host Adaptation and Speciation of the Wheat Pathogen Mycosphaerella graminicola
Source: PubMed Central journal article supplement (PMC3009667; doi:10.1371/journal.pgen.1001189), 2010-12-23

Figure S2a

Intergenic divergence

**Chromosome 1**

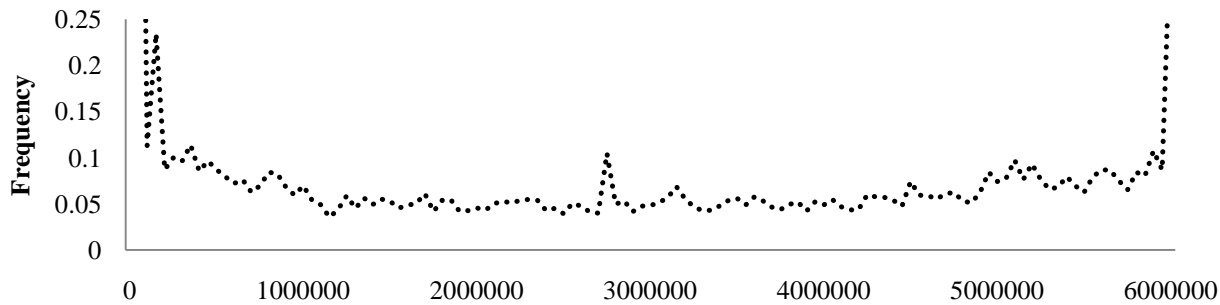

**Chromosome 2**

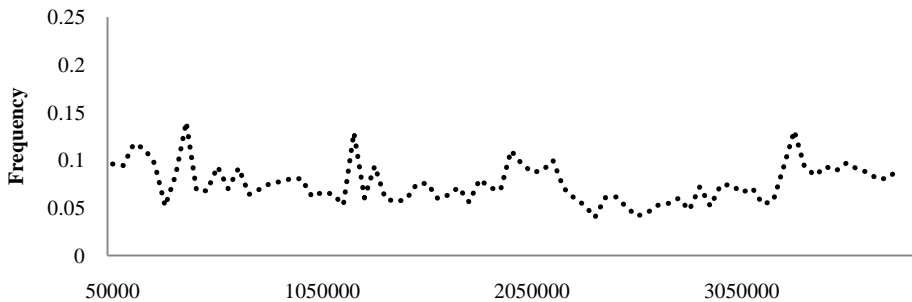

**Chromosome 3**

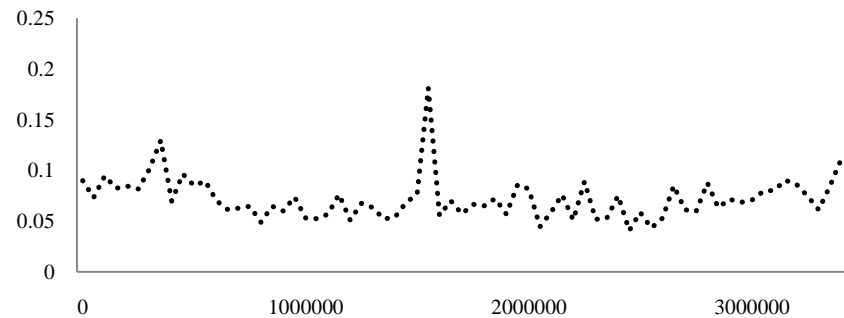

**Chromosome 4**

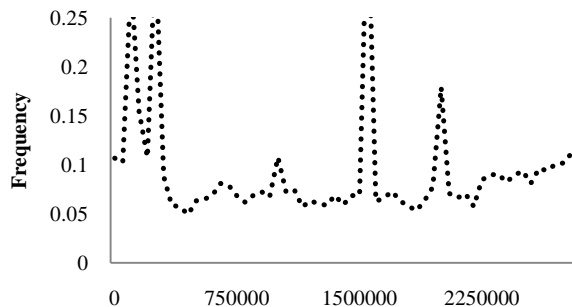

**Chromosome 5**

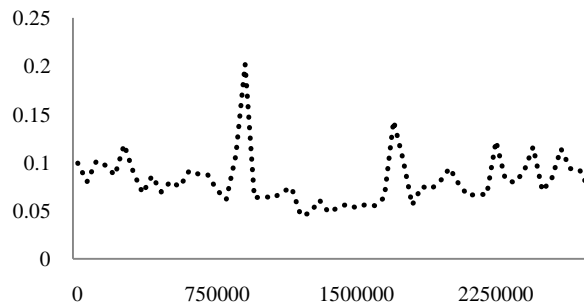

**Chromosome 6**

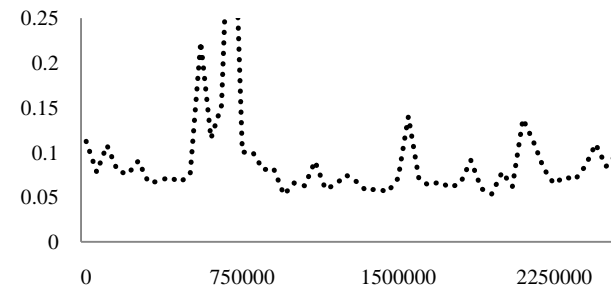

**Chromosome 7**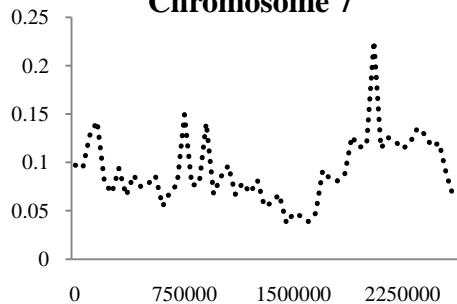**Chromosome 8**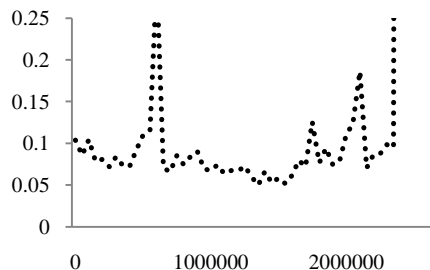**Chromosome 9**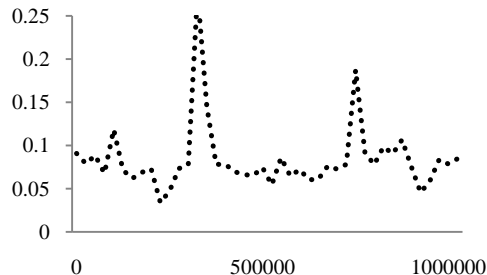**Chromosome 10**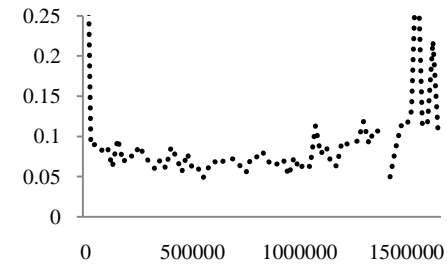**Chromosome 11**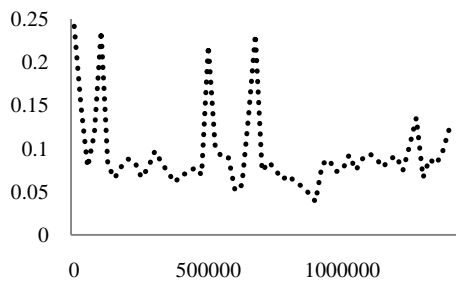**Chromosome 12**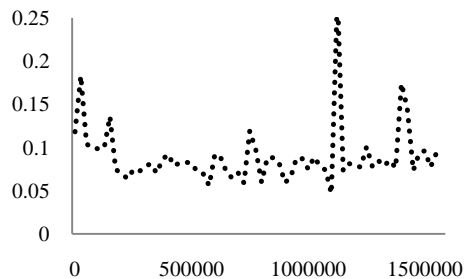**Chromosome 13**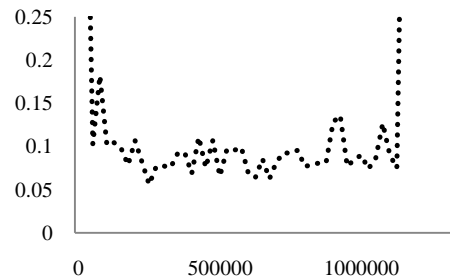**Chromosome 15**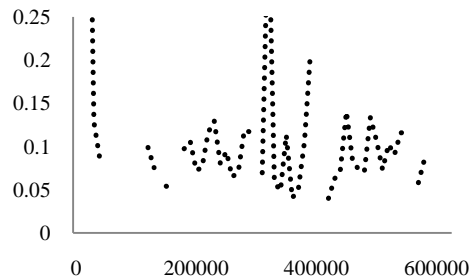**Chromosome 16**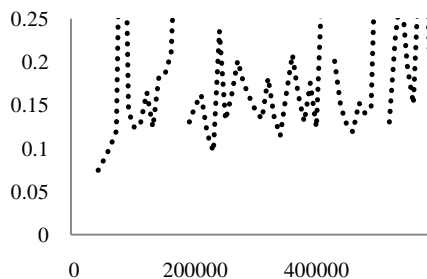**Chromosome 17**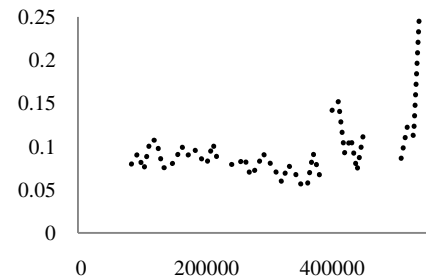**Chromosome 20**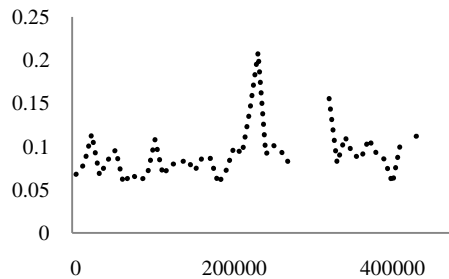**Chromosome 21**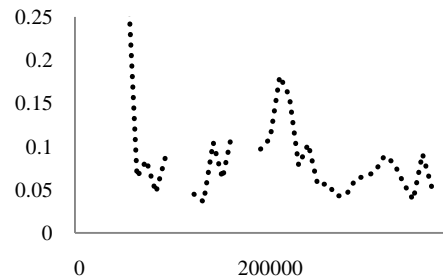

Figure S2b

Ks across  
chromosomes

Chromosome 1

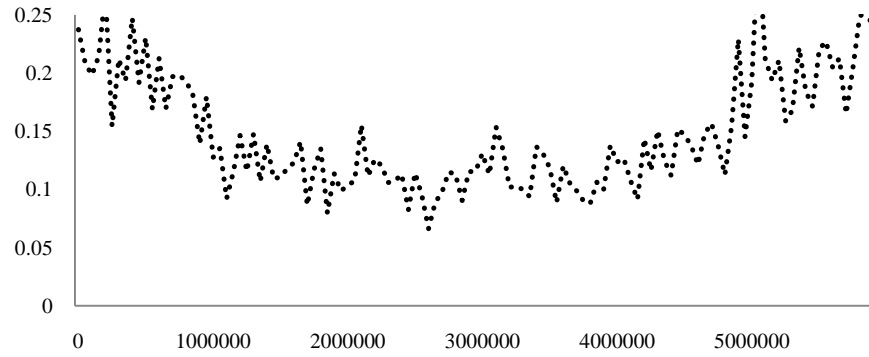

Chromosome 2

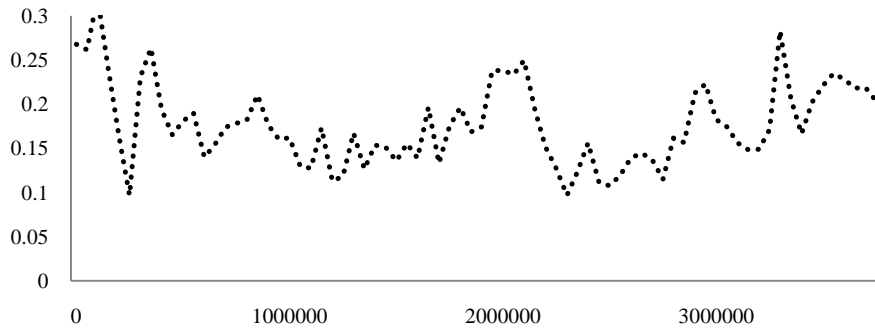

Chromosome 3

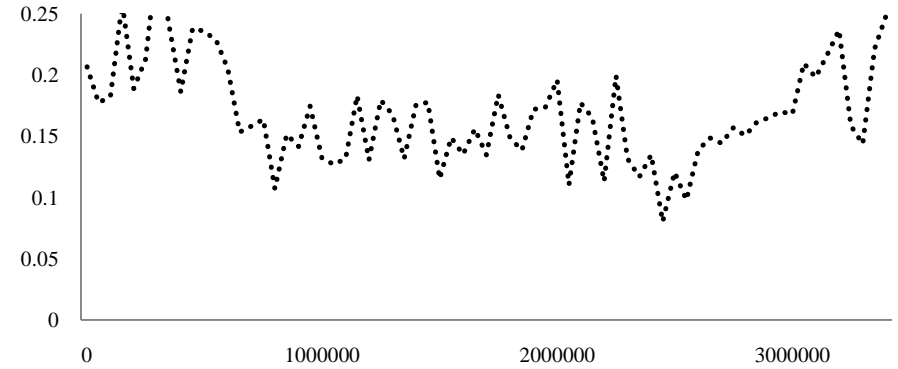

Chromosome 4

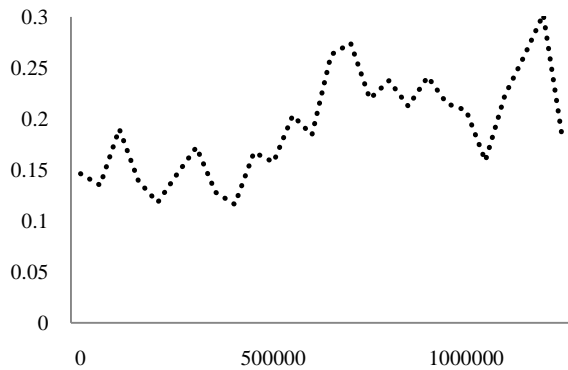

Chromosome 5

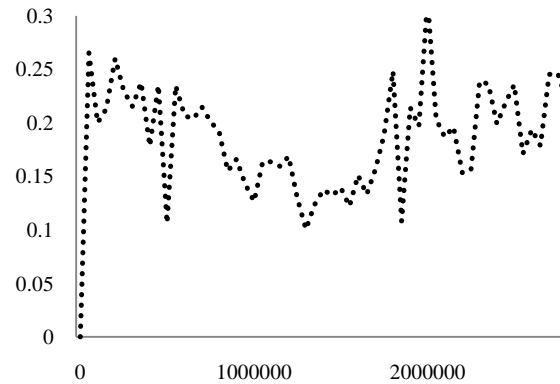

Chromosome 6

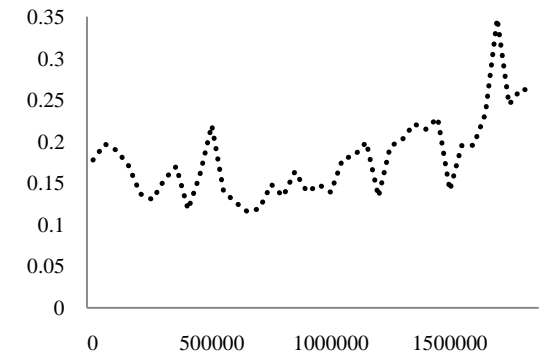

Chromosome 7

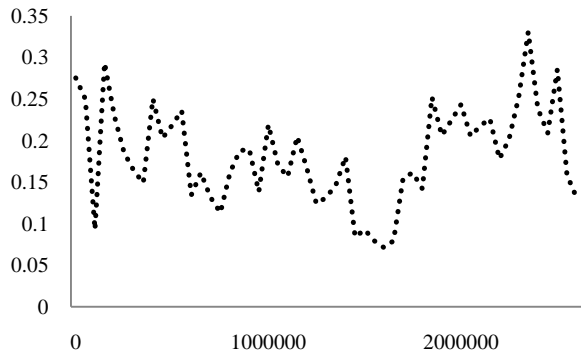

Chromosome 8

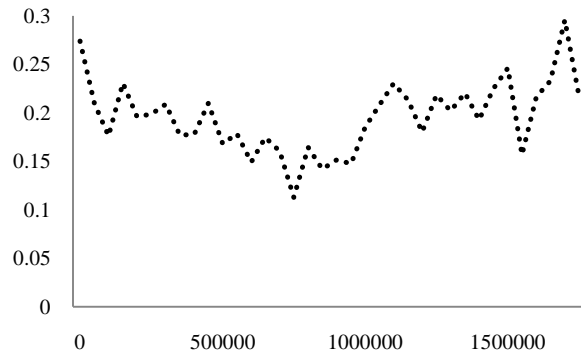

Chromosome 9

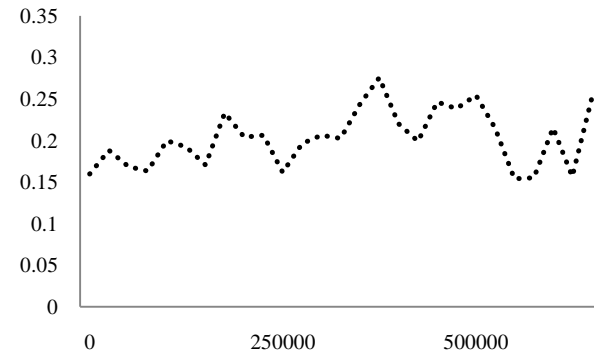

Chromosome 10

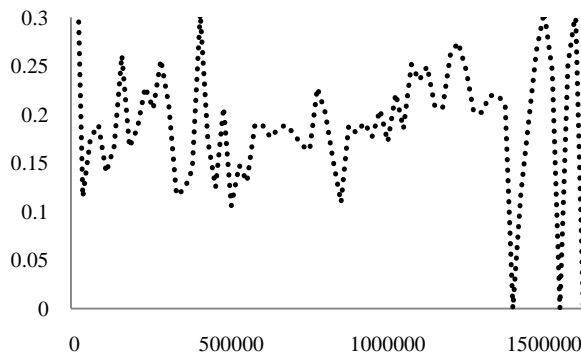

Chromosome 11

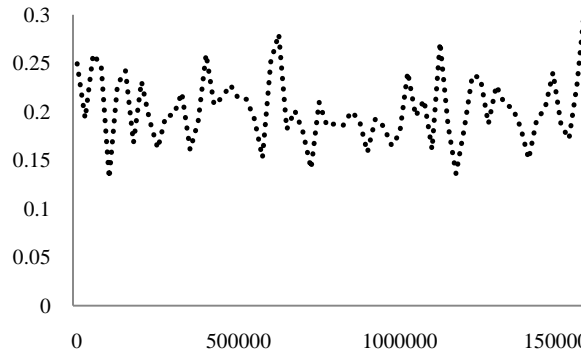

Chromosome 12

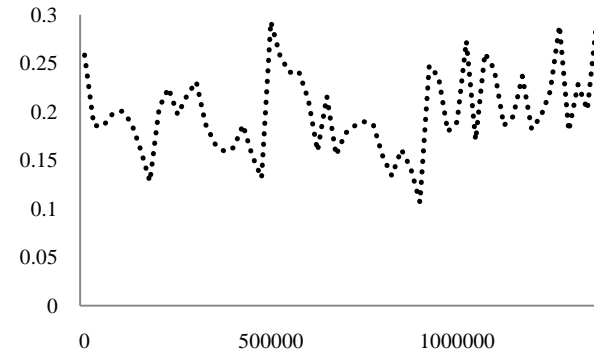

Chromosome 13

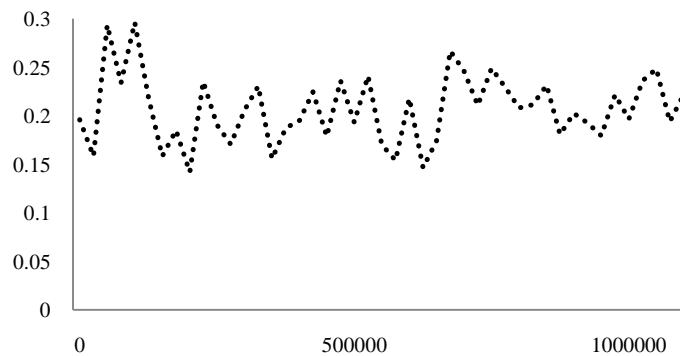

Supplement: pgen.1001189.s003.pdf [file pgen.1001189.s003.pdf]
