# Supplementary material for: Whole-Genome and Chromosome Evolution Associated with Host Adaptation and Speciation of the Wheat Pathogen Mycosphaerella graminicola
Source: PubMed Central journal article supplement (PMC3009667; doi:10.1371/journal.pgen.1001189), 2010-12-23

# Weighted average of coverage on contigs of different lengths

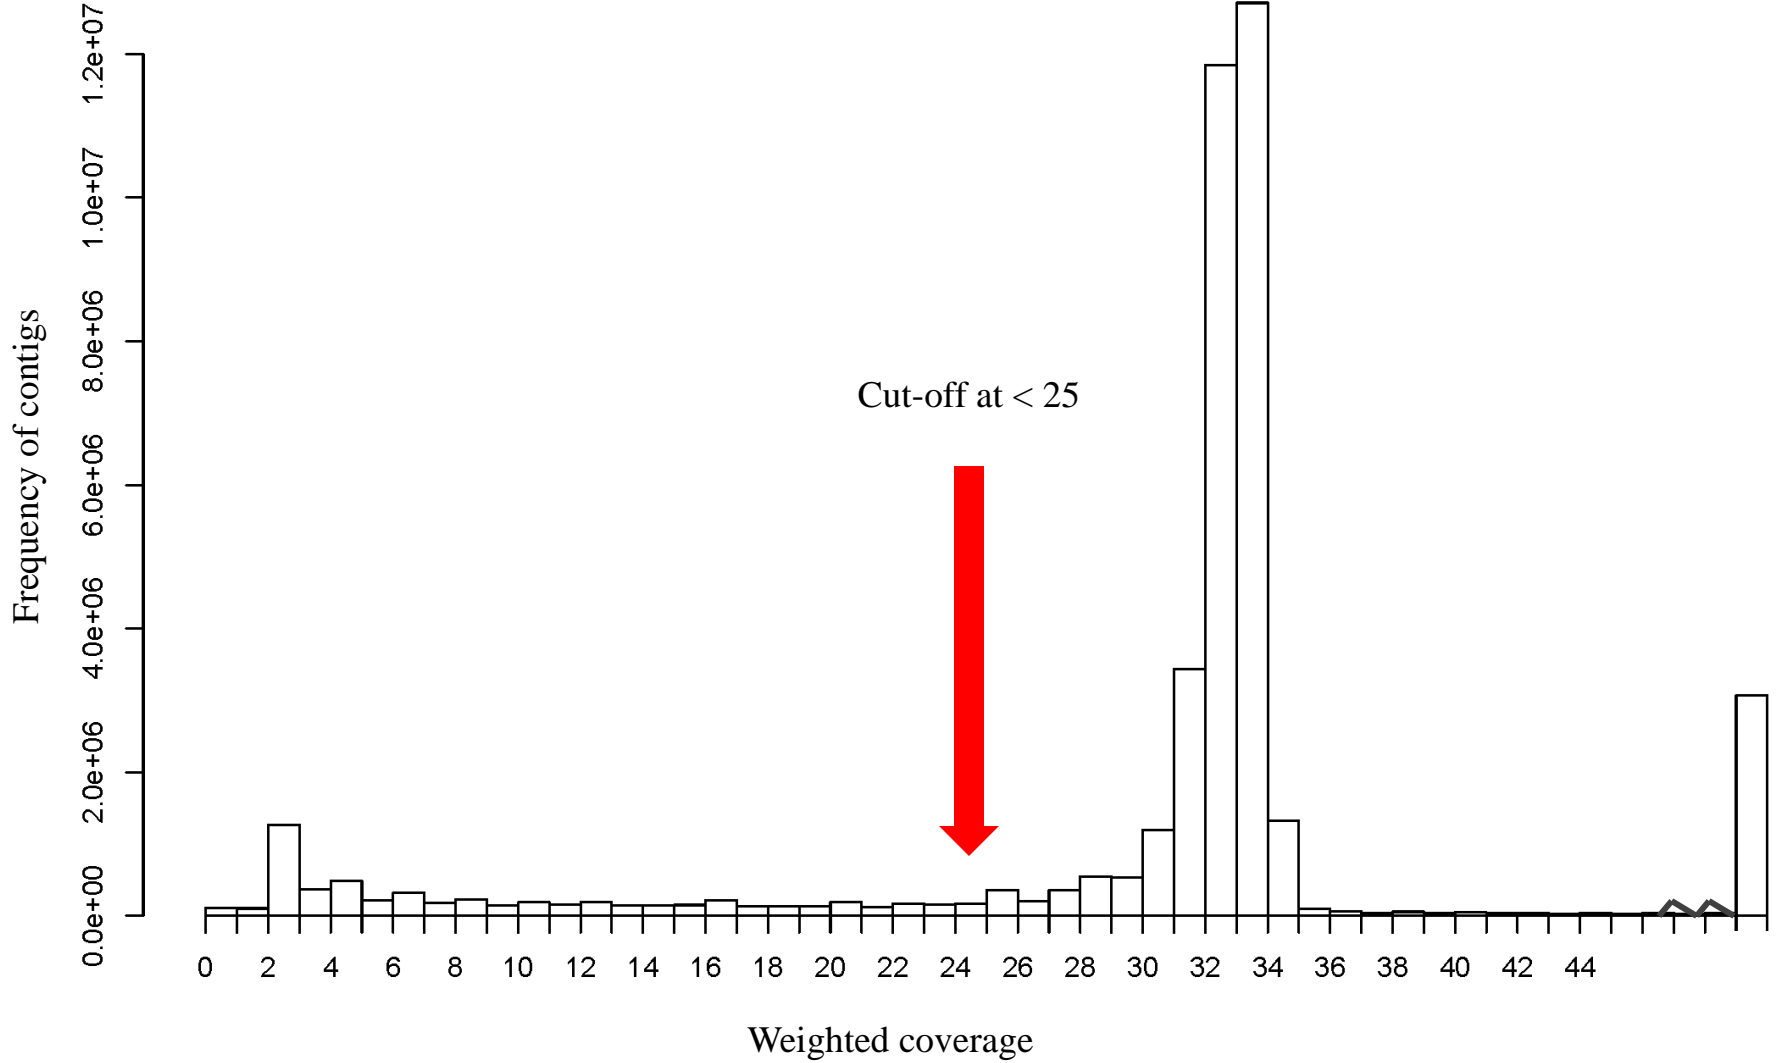

Supplement: pgen.1001189.s004.pdf [file pgen.1001189.s004.pdf]
