# Supplementary material for: Whole-Genome and Chromosome Evolution Associated with Host Adaptation and Speciation of the Wheat Pathogen Mycosphaerella graminicola
Source: PubMed Central journal article supplement (PMC3009667; doi:10.1371/journal.pgen.1001189), 2010-12-23
Supplement: pgen.1001189.s005.pdf [file pgen.1001189.s005.pdf]

| Isolate       | Experiment 1 | Experiment 2 | Experiment 3 | Average % |
|---------------|--------------|--------------|--------------|-----------|
| STIR04-A26b   | 50%          | 50%          | 50%          | 50%       |
| STIR04-3.11.1 | 1%           | 10%          | 1%           | 4%        |
