# Supplementary material for: Whole-Genome and Chromosome Evolution Associated with Host Adaptation and Speciation of the Wheat Pathogen Mycosphaerella graminicola
Source: PubMed Central journal article supplement (PMC3009667; doi:10.1371/journal.pgen.1001189), 2010-12-23
Supplement: pgen.1001189.s006.pdf [file pgen.1001189.s006.pdf]

| Synteny            | Ranges of contig lengths |               |               |            |
|--------------------|--------------------------|---------------|---------------|------------|
|                    | 1000-9999bp              | 10000-49999bp | 50000-99999bp | ≥ 100000bp |
| 1 chromosome hit   |                          |               |               |            |
| Total              | 203                      | 269           | 122           | 68         |
| E <sup>1)</sup>    | 165                      | 238           | 116           | 68         |
| D <sup>2)</sup>    | 38                       | 31            | 6             | 0          |
| 2 chromosome hit   |                          |               |               |            |
| Total              | 7                        | 16            | 9             | 11         |
| EE                 | 3                        | 7             | 8             | 11         |
| ED                 | 3                        | 1             | 0             | 0          |
| DD                 | 1                        | 8             | 1             | 0          |
| ≥ 3 chromosome hit |                          |               |               |            |
| Total              | 6                        | 6             | 3             | 2          |
| EEE                | 1                        | 3             | 2             | 2          |
| EED                | 4                        | 1             | 0             | 0          |
| EDD                | 0                        | 1             | 0             | 0          |
| DDD                | 1                        | 1             | 1             | 0          |

<sup>1)</sup> Essential chromosome

<sup>2)</sup> Dispensable chromosome
