# Supplementary material for: Whole-Genome and Chromosome Evolution Associated with Host Adaptation and Speciation of the Wheat Pathogen Mycosphaerella graminicola
Source: PubMed Central journal article supplement (PMC3009667; doi:10.1371/journal.pgen.1001189), 2010-12-23
Supplement: pgen.1001189.s007.pdf [file pgen.1001189.s007.pdf]

|                               | Repetitive |      | Non-repetitive |      |
|-------------------------------|------------|------|----------------|------|
|                               | bp         | freq | bp             | freq |
| <i>M. graminicola</i> total   | 7123465    | 0.18 | 32728746       | 0.82 |
| <i>M. graminicola</i> aligned | 271101     | 0.01 | 27777342       | 0.70 |
| S1 total                      | 1409860    | 0.04 | 33836640       | 0.96 |
| S1 aligned                    | 271101     | 0.01 | 27777342       | 0.79 |
