# Supplementary material for: Whole-Genome and Chromosome Evolution Associated with Host Adaptation and Speciation of the Wheat Pathogen Mycosphaerella graminicola
Source: PubMed Central journal article supplement (PMC3009667; doi:10.1371/journal.pgen.1001189), 2010-12-23
Supplement: pgen.1001189.s008.pdf [file pgen.1001189.s008.pdf]

| KOG class                                                     | Total annotated genes | Total aligned genes | Total non-aligned genes | Total codons | Average Ka/Ks | Average Ka | Average Ks |
|---------------------------------------------------------------|-----------------------|---------------------|-------------------------|--------------|---------------|------------|------------|
| Extracellular structures                                      | 63                    | 9                   | 54                      | 3396         | 0.205         | 0.032      | 0.161      |
| Nuclear structure                                             | 112                   | 109                 | 3                       | 69401        | 0.193         | 0.025      | 0.156      |
| Defense mechanisms                                            | 118                   | 117                 | 1                       | 50744        | 0.176         | 0.026      | 0.172      |
| Chromatin structure and dynamics                              | 145                   | 98                  | 47                      | 50872        | 0.144         | 0.02       | 0.157      |
| Cytoskeleton                                                  | 206                   | 158                 | 48                      | 92581        | 0.138         | 0.019      | 0.165      |
| RNA processing and modification                               | 332                   | 314                 | 18                      | 188840       | 0.119         | 0.017      | 0.169      |
| Function unknown                                              | 373                   | 373                 | 0                       | 164811       | 0.115         | 0.017      | 0.172      |
| Transcription                                                 | 378                   | 370                 | 8                       | 187213       | 0.11          | 0.015      | 0.153      |
| Secondary metabolites biosynthesis, transport and catabolism  | 292                   | 241                 | 51                      | 124578       | 0.109         | 0.019      | 0.193      |
| Posttranslational modification, protein turnover, chaperones  | 628                   | 557                 | 71                      | 236682       | 0.105         | 0.017      | 0.176      |
| Signal transduction mechanisms                                | 541                   | 460                 | 81                      | 247711       | 0.104         | 0.016      | 0.166      |
| Coenzyme transport and metabolism                             | 111                   | 77                  | 34                      | 30223        | 0.103         | 0.017      | 0.188      |
| General function prediction only                              | 1134                  | 958                 | 176                     | 453682       | 0.097         | 0.015      | 0.176      |
| Cell cycle control, cell division, chromosome partitioning    | 193                   | 149                 | 44                      | 81502        | 0.095         | 0.013      | 0.153      |
| Carbohydrate transport and metabolism                         | 395                   | 323                 | 72                      | 160916       | 0.093         | 0.016      | 0.194      |
| Cell wall/membrane/envelope biogenesis                        | 84                    | 79                  | 5                       | 43848        | 0.088         | 0.013      | 0.175      |
| Inorganic ion transport and metabolism                        | 199                   | 135                 | 64                      | 80174        | 0.086         | 0.014      | 0.184      |
| Replication, recombination and repair                         | 211                   | 178                 | 33                      | 121153       | 0.085         | 0.014      | 0.184      |
| Translation, ribosomal structure and biogenesis               | 351                   | 350                 | 1                       | 144332       | 0.083         | 0.012      | 0.157      |
| Nucleotide transport and metabolism                           | 89                    | 86                  | 3                       | 37814        | 0.08          | 0.015      | 0.197      |
| Lipid transport and metabolism                                | 345                   | 305                 | 40                      | 165797       | 0.077         | 0.012      | 0.187      |
| Amino acid transport and metabolism                           | 320                   | 275                 | 45                      | 132071       | 0.068         | 0.012      | 0.187      |
| Cell motility                                                 | 5                     | 5                   | 0                       | 2814         | 0.068         | 0.01       | 0.162      |
| Intracellular trafficking, secretion, and vesicular transport | 316                   | 250                 | 66                      | 128718       | 0.066         | 0.009      | 0.156      |
| Energy production and conversion                              | 334                   | 327                 | 7                       | 128155       | 0.065         | 0.012      | 0.189      |
