# Supplementary material for: Whole-Genome and Chromosome Evolution Associated with Host Adaptation and Speciation of the Wheat Pathogen Mycosphaerella graminicola
Source: PubMed Central journal article supplement (PMC3009667; doi:10.1371/journal.pgen.1001189), 2010-12-23
Supplement: pgen.1001189.s009.pdf [file pgen.1001189.s009.pdf]

| Chromosome | Protein ID           | Start position | End position | N° of aligned codons | N° of codons in predicted protein | N° exons | EST support in <i>M. graminicola</i> | Nonsyn. mutations | Syn. mutations | Nei-Gojobori Ka/Ks <sup>1)</sup> | Nei-Gojobori Ka | Nei-Gojobori Ks | Nei-Gojobori Z-test |
|------------|----------------------|----------------|--------------|----------------------|-----------------------------------|----------|--------------------------------------|-------------------|----------------|----------------------------------|-----------------|-----------------|---------------------|
| 1          | 88648                | 345834         | 347144       | 178                  | 178                               | 2        | -                                    | 29                | 1              | 8.4660                           | 0.0701          | 0.0083          | 4.1163              |
| 5          | 80707                | 657996         | 658613       | 125                  | 125                               | 1        | +                                    | 24                | 1              | 6.9278                           | 0.0825          | 0.0119          | 3.5281              |
| 9          | 105739               | 1229120        | 1229686      | 106                  | 106                               | 1        | +                                    | 29                | 2              | 4.5537                           | 0.1198          | 0.0263          | 3.3637              |
| 8          | 105480               | 1228554        | 1229995      | 77                   | 78                                | 1        | +                                    | 14                | 1              | 4.5507                           | 0.0803          | 0.0176          | 2.3198              |
| 8          | 105585               | 1882466        | 1882964      | 67                   | 67                                | 1        | +                                    | 8                 | 0              | 4.5357                           | 0.0536          | 0.0118          | 1.7116              |
| 14         | 106599               | 671189         | 671736       | 106                  | 119                               | 1        | +                                    | 19                | 1              | 3.9890                           | 0.0801          | 0.0201          | 2.5227              |
| 17         | 97831                | 366251         | 366577       | 108                  | 109                               | 1        | -                                    | 12                | 1              | 3.7622                           | 0.0486          | 0.0129          | 1.9019              |
| 7          | 105176               | 983411         | 984541       | 140                  | 140                               | 1        | +                                    | 11                | 1              | 3.6357                           | 0.0348          | 0.0096          | 1.7974              |
| 18         | 97878                | 208583         | 209645       | 121                  | 255                               | 3        | -                                    | 13                | 1              | 3.5967                           | 0.0457          | 0.0127          | 1.8658              |
| 4          | 104171               | 1509984        | 1510593      | 53                   | 53                                | 1        | +                                    | 19                | 1              | 3.5180                           | 0.1585          | 0.0450          | 2.3882              |
| 6          | 93764                | 887981         | 888401       | 118                  | 121                               | 2        | -                                    | 11                | 1              | 3.4401                           | 0.0408          | 0.0119          | 1.7168              |
| 9          | 105694               | 727490         | 728225       | 159                  | 161                               | 2        | +                                    | 18                | 2              | 3.1043                           | 0.0508          | 0.0163          | 2.1043              |
| 1          | 33513                | 5083051        | 5083254      | 66                   | 68                                | 1        | +                                    | 16                | 2              | 2.9746                           | 0.1109          | 0.0373          | 2.0017              |
| 1          | 90306                | 5988847        | 5989320      | 88                   | 158                               | 1        | +                                    | 22                | 2              | 2.8947                           | 0.1053          | 0.0364          | 2.0891              |
| 6          | 104710               | 179204         | 179771       | 76                   | 88                                | 2        | +                                    | 27                | 3              | 2.7990                           | 0.1574          | 0.0563          | 2.4156              |
| 5          | 104488               | 1196254        | 1197312      | 155                  | 156                               | 2        | +                                    | 25                | 3              | 2.7381                           | 0.0714          | 0.0261          | 2.2381              |
| 20         | 98031                | 173524         | 175257       | 139                  | 259                               | 5        | -                                    | 27                | 3              | 2.5223                           | 0.0871          | 0.0345          | 2.1813              |
| 2          | 103264               | 1992714        | 1993521      | 109                  | 111                               | 2        | +                                    | 37                | 4              | 2.5060                           | 0.1499          | 0.0598          | 2.5660              |
| 20         | 98060                | 362354         | 362878       | 132                  | 152                               | 2        | -                                    | 23                | 3              | 2.4759                           | 0.0768          | 0.0310          | 1.9565              |
| 7          | 100838 <sup>2)</sup> | 1785582        | 1786221      | 115                  | 115                               | 2        | +                                    | 21                | 3              | 2.4706                           | 0.0824          | 0.0333          | 1.9163              |
| 1          | 90212                | 5612533        | 5613441      | 82                   | 120                               | 2        | +                                    | 25                | 3              | 2.3849                           | 0.1376          | 0.0577          | 2.0384              |
| 21         | 98101                | 253102         | 253948       | 70                   | 120                               | 2        | -                                    | 19                | 2              | 2.3111                           | 0.1204          | 0.0521          | 1.6650              |
| 9          | 105817               | 2092225        | 2092890      | 87                   | 120                               | 1        | +                                    | 19                | 3              | 2.2047                           | 0.1043          | 0.0473          | 1.7115              |
| 17         | 97821                | 302722         | 303180       | 116                  | 119                               | 2        | -                                    | 20                | 3              | 2.1770                           | 0.0762          | 0.0350          | 1.7010              |
| 1          | 83337                | 534698         | 534961       | 88                   | 88                                | 1        | +                                    | 18                | 3              | 2.0135                           | 0.0911          | 0.0452          | 1.4015              |
| 12         | 106257               | 176773         | 177370       | 96                   | 98                                | 1        | +                                    | 28                | 5              | 1.7696                           | 0.1323          | 0.0748          | 1.6746              |
| 20         | 98059                | 360675         | 361856       | 200                  | 394                               | 1        | -                                    | 55                | 10             | 1.6948                           | 0.1199          | 0.0708          | 1.8643              |
| 20         | 98027                | 152654         | 153616       | 293                  | 321                               | 1        | -                                    | 45                | 7              | 1.6931                           | 0.0663          | 0.0392          | 1.7099              |
| 1          | 88614                | 211916         | 212437       | 95                   | 174                               | 1        | -                                    | 33                | 6              | 1.6150                           | 0.1544          | 0.0956          | 1.3584              |
| 11         | 96691                | 938961         | 939374       | 138                  | 138                               | 1        | -                                    | 55                | 10             | 1.6075                           | 0.1753          | 0.1091          | 1.7475              |
| 14         | 106598               | 668801         | 670705       | 440                  | 445                               | 3        | +                                    | 84                | 16             | 1.6044                           | 0.0842          | 0.0525          | 2.0817              |
| 1          | 102326               | 2430482        | 2430800      | 71                   | 74                                | 1        | +                                    | 3                 | 0              | -                                | 0.0176          | 0.0000          | 1.7475              |
| 1          | 102715               | 4102944        | 4103468      | 59                   | 62                                | 1        | +                                    | 3                 | 0              | -                                | 0.0227          | 0.0000          | 1.7521              |
| 1          | 90122                | 5331411        | 5332291      | 107                  | 108                               | 3        | -                                    | 4                 | 0              | -                                | 0.0161          | 0.0000          | 2.0163              |
| 2          | 108330               | 3382976        | 3384058      | 40                   | 64                                | 3        | -                                    | 10                | 0              | -                                | 0.1075          | 0.0000          | 3.3474              |
| 3          | 79746                | 55468          | 55976        | 47                   | 76                                | 2        | +                                    | 3                 | 0              | -                                | 0.0285          | 0.0000          | 1.7573              |
| 3          | 103617               | 907856         | 908908       | 92                   | 92                                | 1        | +                                    | 8                 | 0              | -                                | 0.0380          | 0.0000          | 2.8837              |
| 4          | 104217               | 1865219        | 1865677      | 76                   | 76                                | 1        | +                                    | 9                 | 0              | -                                | 0.0520          | 0.0000          | 3.0812              |
| 9          | 82188                | 1590928        | 1591453      | 52                   | 52                                | 1        | +                                    | 16                | 0              | -                                | 0.1341          | 0.0000          | 4.2985              |
| 9          | 82188                | 1590928        | 1591453      | 49                   | 52                                | 1        | +                                    | 4                 | 0              | -                                | 0.0353          | 0.0000          | 2.0363              |
| 11         | 106231               | 1469937        | 1470567      | 75                   | 75                                | 1        | +                                    | 3                 | 0              | -                                | 0.0171          | 0.0000          | 1.7471              |
| 12         | 106324               | 564439         | 564970       | 57                   | 57                                | 1        | +                                    | 10                | 0              | -                                | 0.0759          | 0.0000          | 3.2897              |
| 20         | 98001                | 35726          | 36951        | 13                   | 254                               | 4        | -                                    | 4                 | 0              | -                                | 0.1290          | 0.0000          | 2.1430              |

<sup>1)</sup> Not calculated for synonymous mutations = 0

<sup>2)</sup> Signal peptide
