# Supplementary material for: Whole-Genome and Chromosome Evolution Associated with Host Adaptation and Speciation of the Wheat Pathogen Mycosphaerella graminicola
Source: PubMed Central journal article supplement (PMC3009667; doi:10.1371/journal.pgen.1001189), 2010-12-23
Supplement: pgen.1001189.s010.pdf [file pgen.1001189.s010.pdf]

|                              | No of sequences <i>M. graminicola</i> / S1 | Nucleotides | No of fixed differences | Polymorphic sites in <i>M. graminicola</i> | Polymorphic sites in S1 | Synonymous substitutions | Nonsynonymous substitutions |
|------------------------------|--------------------------------------------|-------------|-------------------------|--------------------------------------------|-------------------------|--------------------------|-----------------------------|
| Mating type 1-1 gene         | 1 / 1                                      | 888         | 12                      |                                            |                         | 7                        | 5                           |
| Mating type locus 7Kb        | 1 / 1                                      | 7540        | 423                     |                                            |                         |                          |                             |
| Partial mating type 1-1 gene | 8 / 9                                      | 511         | 9                       | 2                                          | 0                       | 6                        | 3                           |
| MT 1 R4F3                    | 116 / 21                                   | 494         | 10                      | 3                                          | 0                       |                          |                             |
| MT2 R3F2                     | 76 / 22                                    | 511         | 13                      | 1                                          | 0                       |                          |                             |
